# Supplementary material for: Ghosts of Cultivation Past - Native American Dispersal Legacy Persists in Tree Distribution
Source: PubMed Central journal article supplement (PMC4794212; doi:10.1371/journal.pone.0150707), 2016-03-16
Supplement: pone.0150707.s001.pdf [file pone.0150707.s001.pdf]

1 **S2** Figure. Barplots showing *Gleditsia triacanthos* (a) abundance in Cherokee and control  
2 sites from 2014 sampling (b) and *G. triacanthos* distance from Cherokee and control sites  
3 using data from the All Taxa Biodiversity Inventory.

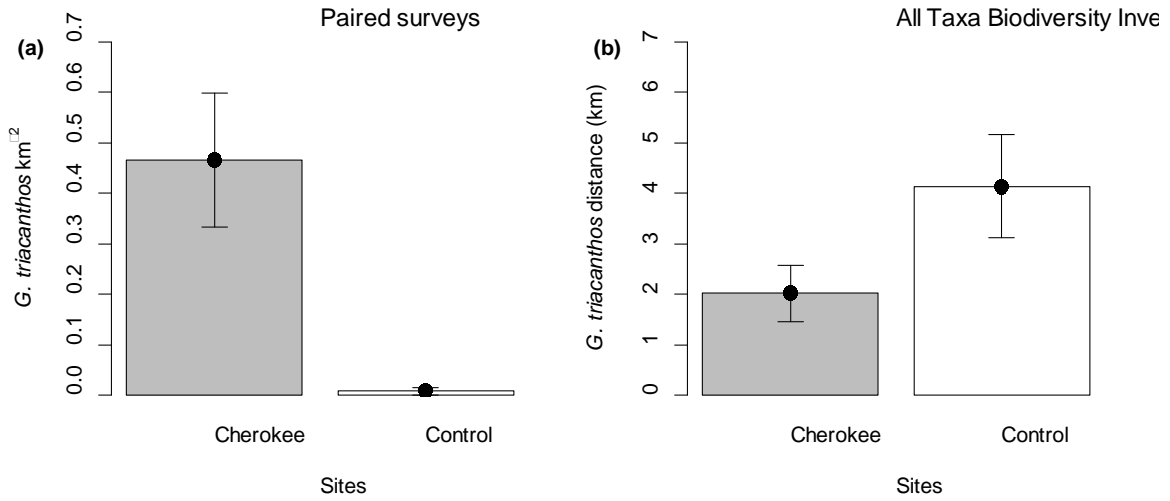

4
