# Supplementary material for: Ghosts of Cultivation Past - Native American Dispersal Legacy Persists in Tree Distribution
Source: PubMed Central journal article supplement (PMC4794212; doi:10.1371/journal.pone.0150707), 2016-03-16
Supplement: pone.0150707.s002.pdf [file pone.0150707.s002.pdf]

**S1 Table.** Environmental variables (mean  $\pm$  SD) across sites and habitat types. The environmental variables are diffuse light (light), soil moisture (moist), ground temperature (temp) and vegetative ground cover (cvr) at two sites, Gibson Bottoms (Gibson) and Tessentee Bottomland Preserve (Tessentee) and three habitat types, forest, wetland and riparian.

|             | Light (%)       | Moist (%)      | Temp (°C)      | Cvr (%)         |
|-------------|-----------------|----------------|----------------|-----------------|
| Gibson      | 36.2 $\pm$ 23.8 | 10.6 $\pm$ 5.7 | 20.2 $\pm$ 0.2 | 62.5 $\pm$ 27.0 |
| Tessentee   | 27.1 $\pm$ 20.2 | 13.7 $\pm$ 3.1 | 19.6 $\pm$ 0.7 | 59.4 $\pm$ 14.0 |
| Forest edge | 13.1 $\pm$ 11.0 | 11.6 $\pm$ 3.9 | 19.8 $\pm$ 0.5 | 34.3 $\pm$ 17.3 |
| Floodplain  | 29.9 $\pm$ 15.9 | 16.6 $\pm$ 3.0 | 19.3 $\pm$ 0.5 | 71.1 $\pm$ 14.1 |
| Terrace     | 49.9 $\pm$ 21.6 | 8.3 $\pm$ 2.6  | 20.5 $\pm$ 0.3 | 68.5 $\pm$ 14.7 |
